# Supplementary material
Source: Royal Society of Chemistry journal article supplement (doi:10.1039/d6cc01908k)
Supplement: d6cc01908k1.pdf [file d6cc01908k1.pdf]

## Supplementary Information

# Hierarchical Ru Nanoparticles Decorated MoS<sub>2</sub>@Ni-MOF for Highly Efficient Overall Water Splitting

Yongyan Xue<sup>a</sup>, Jing Chen<sup>a</sup>, Jinglin Guo<sup>a</sup>, Yueyue Wang<sup>a</sup>, Jie Yang<sup>\*b</sup>, Tuoping Hu<sup>a</sup>, and Xiao-Qing Wang<sup>\*a</sup>

- a. Shanxi Key Laboratory of Hydrogen Energy Carbon Electrode Materials, School of Chemistry and Chemical Engineering, North University of China, Taiyuan 030051, PR China.
- b. Shandong Provincial Key Laboratory of Chemical Energy Storage and Novel Cell Technology, and School of Chemistry and Chemical Engineering, Liaocheng University, Liaocheng 252000, PR China.

## Materials

The nickel chloride hexahydrate ( $\text{NiCl}_2 \cdot 6\text{H}_2\text{O}$ ) used in the experiment was supplied by Tianjin Beichen Founder. Potassium hydroxide (KOH) was purchased from Da Mao (China) Reagent. The ligand 2-aminoterephthalic acid (2-NH<sub>2</sub>-BDC, 98%), sodium molybdate ( $\text{Na}_2\text{MoO}_4$ ), and thioacetamide ( $\text{C}_2\text{H}_5\text{NS}$ ) were all obtained from Aladdin (China) Reagent. Ruthenium(III) chloride ( $\text{RuCl}_3$ ) was provided by J&K Scientific Ltd.. Platinum on activated carbon (Pt/C, 20% Pt) was supplied by Beijing Innochem Technology Co., Ltd.. Ruthenium(IV) oxide, anhydrous ( $\text{RuO}_2$  powder) was obtained from Alfa Aesar (China) Chemistry Co., Ltd.. Nickel foam (NF, 1.5 mm) was purchased from Taiyuan Lizhiyuan Technology Co., Ltd.. Nafion® 117 solution (~5%) was supplied by Sigma-Aldrich (USA). The nickel foam substrates (1.0 cm × 1.0 cm) were sequentially ultrasonically cleaned in dilute hydrochloric acid, acetone, and deionized water for 15 minutes each to remove surface impurities. All solvents were commercially sourced, and chemical reagents were used as received without further purification.

## Synthesis of Ni-MOF-BDC/NF

The Ni-MOF material was synthesized following a previously reported method for NH<sub>2</sub>-MIL-101(Ni)<sup>S1</sup>. First, 1.24 mmol of 2-NH<sub>2</sub>-BDC was dissolved in 15 mL of DMF to form Solution A. Then, 2.5 mmol of  $\text{NiCl}_2 \cdot 6\text{H}_2\text{O}$  was dissolved in 15 mL of DMF to form Solution B. Subsequently, Solution A was added to Solution B, and the mixture was sonicated for 30 minutes to form a homogeneous precursor solution. The mixture was then transferred into a 25 mL Teflon-lined stainless-steel autoclave. A pre-treated piece of nickel foam (NF, 1.0 × 1.0 cm) was immersed in the solution. The autoclave was sealed and maintained at 110 °C for 20 hours. After the reaction, the NF was taken out and thoroughly washed multiple times with DMF and absolute ethanol. Finally, it was dried in a vacuum oven at 60 °C for 8 hours.

## Synthesis of MoS<sub>2</sub>@Ni-MOF-BDC/NF

0.15 mmol of  $\text{Na}_2\text{MoO}_4$  and 0.1 mmol of  $\text{C}_2\text{H}_5\text{NS}$  were dissolved in 7.5 mL of deionized water. The mixture was ultrasonicated for 10 minutes and then transferred into a 5 mL Teflon-lined stainless-steel autoclave. A piece of Ni-MOF-BDC/NF was vertically immersed in the solution. The autoclave was maintained at 160 °C for 6 hours. After the reaction, the sample was taken out, thoroughly rinsed with deionized water, and dried in a vacuum oven at 60 °C for 8 hours.

### **Synthesis of Ru<sub>x</sub>@MoS<sub>2</sub>@Ni-MOF-BDC/NF (X = 0.10, 0.15, 0.20)**

For the preparation of Ru<sub>0.15</sub>@MoS<sub>2</sub>@Ni-MOF-BDC/NF: 0.15 mmol of RuCl<sub>3</sub> was dissolved in 7.5 mL of deionized water. The solution was ultrasonicated at room temperature for 10 minutes, and the precursor MoS<sub>2</sub>@Ni-MOF-BDC/NF was vertically immersed in the solution. The reaction was allowed to proceed at 80 °C for 2 hours under static conditions. After the reaction, the electrode was taken out, rinsed with deionized water, and then dried at 60 °C for 8 hours (the average catalyst loading is about 0.5 mg·cm<sup>-2</sup>). When the amounts of RuCl<sub>3</sub> added were 0.10 mmol and 0.20 mmol, respectively, the resulting products were denoted as Ru<sub>0.10</sub>@MoS<sub>2</sub>@Ni-MOF-BDC/NF and Ru<sub>0.20</sub>@MoS<sub>2</sub>@Ni-MOF-BDC/NF.

### **Synthesis of Pt-C/NF and RuO<sub>2</sub>/NF electrodes**

3.0 mg of Pt/C or RuO<sub>2</sub> catalyst was dispersed in a mixed solvent consisting of 300 μL deionized water, 300 μL absolute ethanol, and 30 μL of 5% Nafion solution. The mixture was ultrasonicated for 30 minutes to form a homogeneous suspension. Then, 105 μL of the suspension was pipetted and slowly dropped onto the surface of a pre-treated and dried nickel foam (1.0 × 1.0 cm<sup>2</sup>). After drying at room temperature, the Pt-C/NF electrode and RuO<sub>2</sub>/NF electrode were obtained, with a catalyst loading of approximately 0.5 mg·cm<sup>-2</sup>.

### **Physical measurements**

The crystalline structure of the samples (Ni-MOF-BDC/NF, MoS<sub>2</sub>@Ni-MOF-BDC/NF, Ru<sub>0.10</sub>@MoS<sub>2</sub>@Ni-MOF-BDC/NF, Ru<sub>0.15</sub>@MoS<sub>2</sub>@Ni-MOF-BDC/NF and Ru<sub>0.20</sub>@MoS<sub>2</sub>@Ni-MOF-BDC/NF) were analyzed utilizing powder X-ray diffraction (XRD, D/max-2400, Rigaku, Ul-tima IV) with a Cu K $\alpha$  radiation ( $\lambda = 0.154$  nm) source, operated at 40 kV and 30 mA, within the 2 $\theta$  range of 5-65°. The morphology and structure of the electrodes were characterized using scanning electron microscopy (SEM). The elements of the electrodes were determined by X-ray photoelectron spectroscopy (XPS) measurements (Thermo Scientific K-Alpha) and the patterns were collected using Al K $\alpha$  radiation. For TEM analysis, the electrodes (1 × 1 cm<sup>2</sup>) were dispersed ultrasonically in anhydrous ethanol, and the dispersion was taken for analysis. TEM and HRTEM images were recorded using a JEOL model JEM-2100F (Japan) at an accelerating voltage of 200 kV.

### **Electrochemical Characterization**

All electrochemical measurements were conducted utilizing a CHI660E electrochemical

workstation (Shanghai, Chen Hua) with a conventional three-electrode system in 1.0 M KOH electrolyte and seawater solution at 25°C, in which the graphite rod served as the counter electrode, the as-prepared samples were utilized as the working electrodes, and Ag/AgCl (KCl saturated) was employed as the reference electrode. Before conducting the electrochemical measurement, the catalysts underwent stabilization through 100 cyclic voltammetry (CV) cycles within the potential range of -0.15 to 0.1 mV to ensure consistent performance. The polarization curves were obtained through linear sweep voltammetry (LSV) measurements conducted at a scanning rate of 5 mV s<sup>-1</sup>, incorporating 90% iR compensation. The Tafel slope was established by graphing the overpotential against the logarithm of current density (log |J|). All potentials reported in the work were converted relative to reversible hydrogen electrode (RHE) according to the Nernst equation ( $E_{\text{RHE}} = E_{\text{Ag/AgCl}} + 0.198 + 0.059 \times \text{pH}$ ). By plotting the difference between the anode and cathode current density ( $\Delta j = j_a - j_c$ ) at half the potential of CV measurement and the scan rate, the linear slope obtained is twice that of the double layer capacitance ( $C_{\text{dl}}$ ). The ECSA value can be calculated by the formula  $\text{ECSA} = C_{\text{dl}}/C_s \cdot A$ , where  $C_s$  is the specific capacitance using the average value of 0.04 mF cm<sup>-2</sup>,  $A$  is the actual surface area of the electrode. The solution resistance was obtained from the electrochemical impedance spectroscopy (EIS), which was performed at applied potential with frequency range of 10 mHz-105 kHz condition of 10 mV sinus amplitude for both the HER and OER. The long durability was performed through the chronopotentiometric measurement.

Table S1 HER, OER overpotentials, overall water splitting potentials at 10 mA cm<sup>-2</sup> and stability times compared with previous reports.

| Sample                                                               | Electrolyte | HER Over Potential (mV) | OER Over Potential (mV) | Overall Water Splitting Potential (V) | Ref.      |
|----------------------------------------------------------------------|-------------|-------------------------|-------------------------|---------------------------------------|-----------|
| Ru <sub>0.15</sub> @MoS <sub>2</sub> @Ni-MOF-BDC/NF                  | 1.0 M KOH   | 53                      | 175                     | 1.53                                  | This work |
| Fe-MOF@MoS <sub>2</sub> -6h                                          | 1.0 M KOH   | 118                     | 187                     | 1.52                                  | 2         |
| Ru-CoMOF@MoS <sub>2</sub>                                            | 1.0 M KOH   | 289                     | 340                     | 1.59                                  | 3         |
| Ru Fe-MOF-PA <sub>60</sub>                                           | 1.0 M KOH   | 37                      | 217                     | 1.49                                  | 4         |
| CoRu-MoS <sub>2</sub>                                                | 1.0 M KOH   | 52                      | 308                     | 1.67                                  | 5         |
| Ru/Ni/Co@NC                                                          | 1.0 M KOH   | 34                      | 174                     | 1.44                                  | 6         |
| 0.1Fe-NiS/MoS <sub>2</sub>                                           | 1.0 M KOH   | 120                     | 297                     | 1.66                                  | 7         |
| CoFe <sub>2</sub> O <sub>4</sub> /MoS <sub>2</sub>                   | 1.0 M KOH   | 154                     | 161                     | 1.54                                  | 8         |
| CoS <sub>2</sub> -MoS <sub>2</sub> HNA <sub>s</sub> /Ti              | 1.0 M KOH   | 82                      | 266                     | 1.56                                  | 9         |
| HMS/MoS <sub>2</sub> /Co <sub>9</sub> S <sub>8</sub> -31             | 1.0 M KOH   | 127                     | 280                     | 1.56                                  | 10        |
| Fe-doped Co-LDH@MoS <sub>2</sub> -Ni <sub>3</sub> S <sub>2</sub> /NF | 1.0 M KOH   | 95                      | 220                     | 1.54                                  | 11        |

Table S2 HER fitting results of EIS for Ni-MOF-BDC/NF, MoS<sub>2</sub>@Ni-MOF-BDC/NF, Ru<sub>x</sub>@MoS<sub>2</sub>@Ni-MOF-BDC/NF (x = 0.10, 0.15 and 0.20) and Pt-C/NF.

| Sample                                              | R <sub>s</sub> (ohm) | R <sub>ct</sub> (ohm) |
|-----------------------------------------------------|----------------------|-----------------------|
| Ni-MOF-BDC/NF                                       | 1.60                 | 3.08                  |
| MoS <sub>2</sub> @Ni-MOF-BDC/NF                     | 1.42                 | 1.51                  |
| Ru <sub>0.10</sub> @MoS <sub>2</sub> @Ni-MOF-BDC/NF | 1.55                 | 0.46                  |
| Ru <sub>0.15</sub> @MoS <sub>2</sub> @Ni-MOF-BDC/NF | 1.30                 | 0.44                  |
| Ru <sub>0.20</sub> @MoS <sub>2</sub> @Ni-MOF-BDC/NF | 1.40                 | 0.47                  |
| Pt-C/NF                                             | 1.70                 | 2.17                  |

Table S3 OER fitting results of EIS for Ni-MOF-BDC/NF, MoS<sub>2</sub>@Ni-MOF-BDC/NF, Ru<sub>x</sub>@MoS<sub>2</sub>@Ni-MOF-BDC/NF (x = 0.10, 0.15 and 0.20) and RuO<sub>2</sub>/NF.

| Sample                                              | R <sub>s</sub> (ohm) | R <sub>ct</sub> (ohm) |
|-----------------------------------------------------|----------------------|-----------------------|
| Ni-MOF-BDC/NF                                       | 1.37                 | 4.06                  |
| MoS <sub>2</sub> @Ni-MOF-BDC/NF                     | 1.47                 | 1.32                  |
| Ru <sub>0.10</sub> @MoS <sub>2</sub> @Ni-MOF-BDC/NF | 1.56                 | 1.48                  |
| Ru <sub>0.15</sub> @MoS <sub>2</sub> @Ni-MOF-BDC/NF | 1.45                 | 0.81                  |
| Ru <sub>0.20</sub> @MoS <sub>2</sub> @Ni-MOF-BDC/NF | 1.52                 | 1.11                  |
| RuO <sub>2</sub> /NF                                | 1.53                 | 6.59                  |

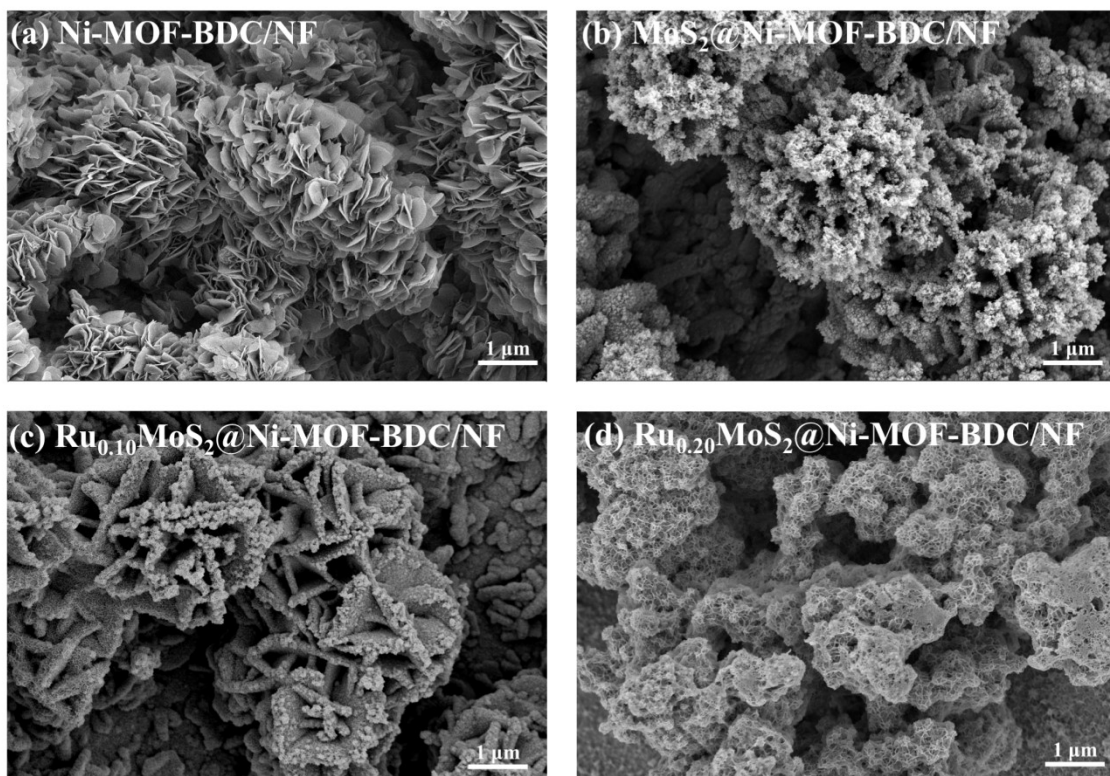

Fig. S1 SEM images of (a) Ni-MOF-BDC/NF; (b) MoS<sub>2</sub>@Ni-MOF-BDC/NF; (c) Ru<sub>0.10</sub>@MoS<sub>2</sub>@Ni-MOF-BDC/NF; (d) Ru<sub>0.20</sub>@MoS<sub>2</sub>@Ni-MOF-BDC/NF

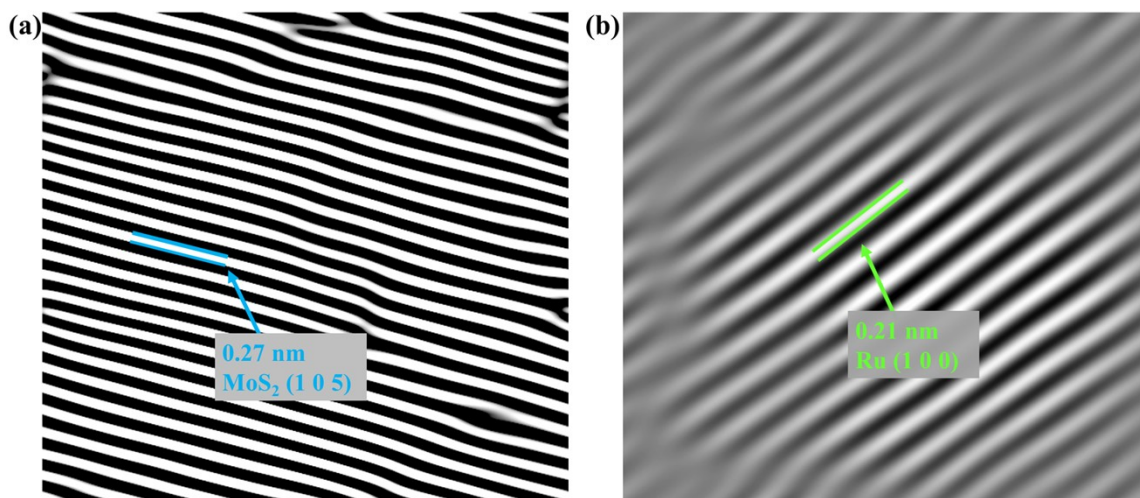

Fig. S2 IFFT images of Ru<sub>0.15</sub>@MoS<sub>2</sub>@Ni-MOF-BDC/NF

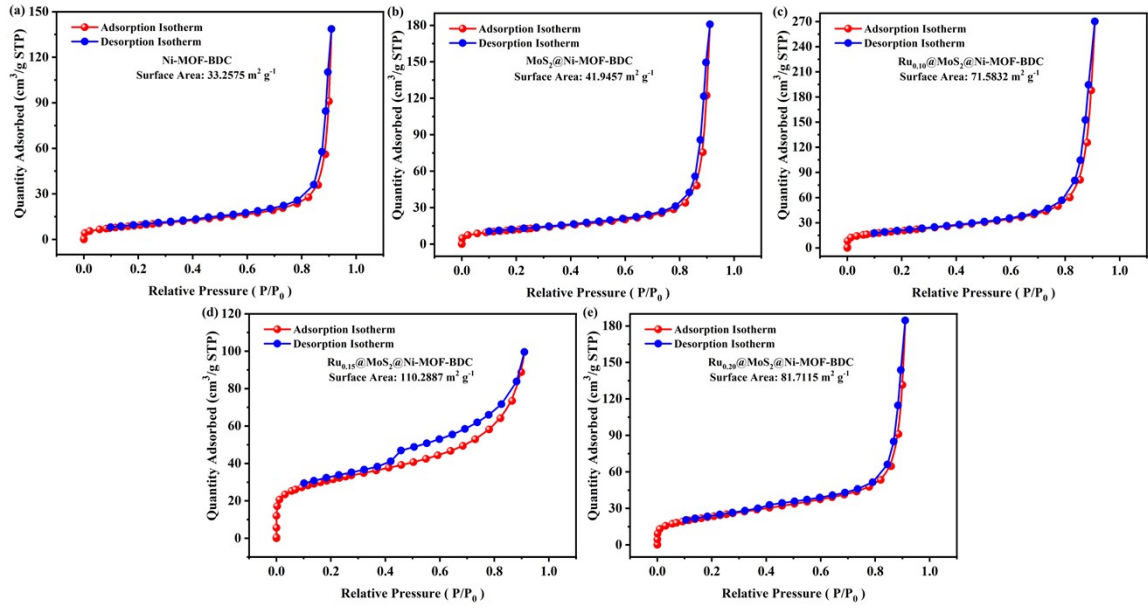

Fig. S3 The  $N_2$  adsorption-desorption isotherm of Ni-MOF-BDC,  $MoS_2@Ni-MOF-BDC$  and  $Ru_x@MoS_2@Ni-MOF-BDC$  ( $X=0.10, 0.15, 0.20$ ) at 77 K.

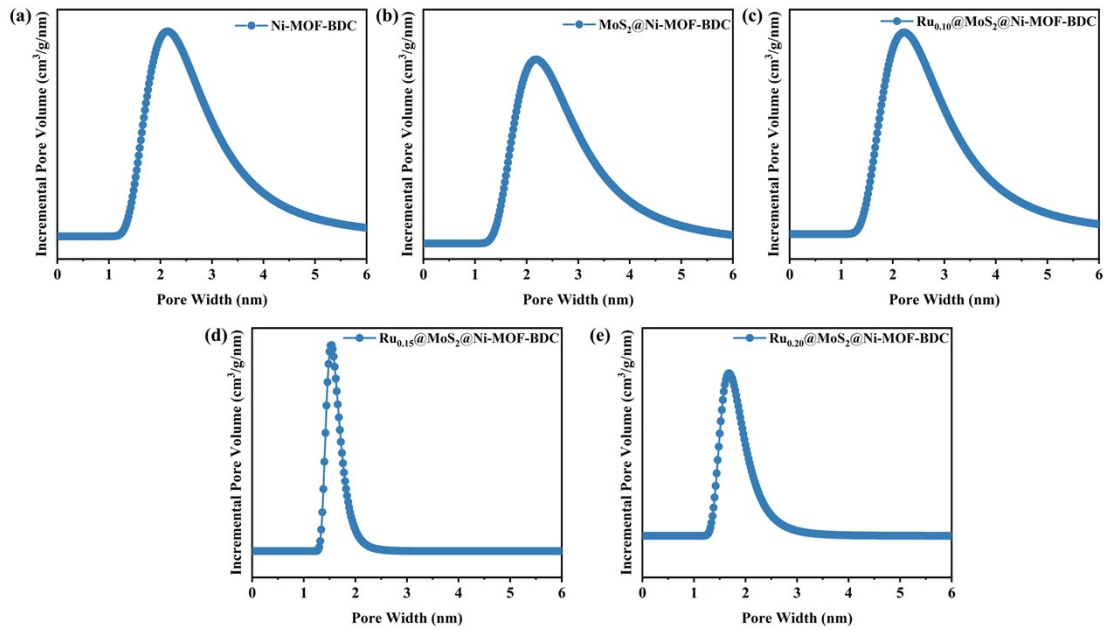

Fig. S4 The pore size distribution curves of Ni-MOF-BDC,  $MoS_2@Ni-MOF-BDC$  and  $Ru_x@MoS_2@Ni-MOF-BDC$  ( $X=0.10, 0.15, 0.20$ ).

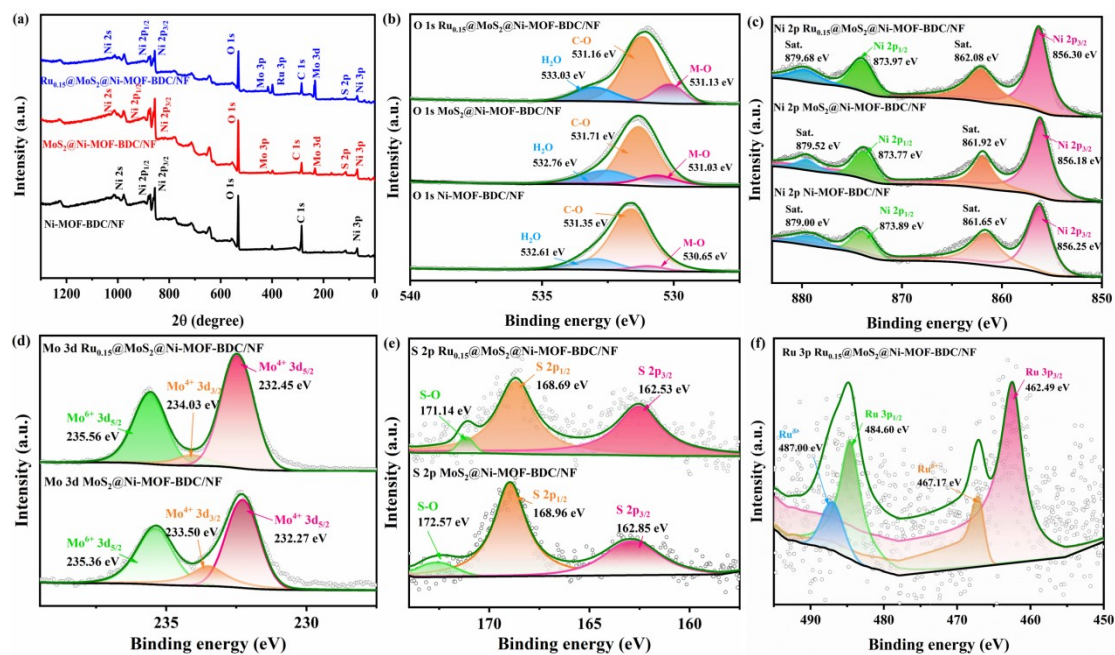

Fig. S5 (a) XPS survey spectra of Ni-MOF-BDC/NF, MoS<sub>2</sub>@Ni-MOF-BDC/NF and Ru<sub>0.15</sub>@MoS<sub>2</sub>@Ni-MOF-BDC/NF; (b-f) The high-resolution XPS spectra of O 1s, Ni 2p, Mo 3d, S 2p, Ru 3p

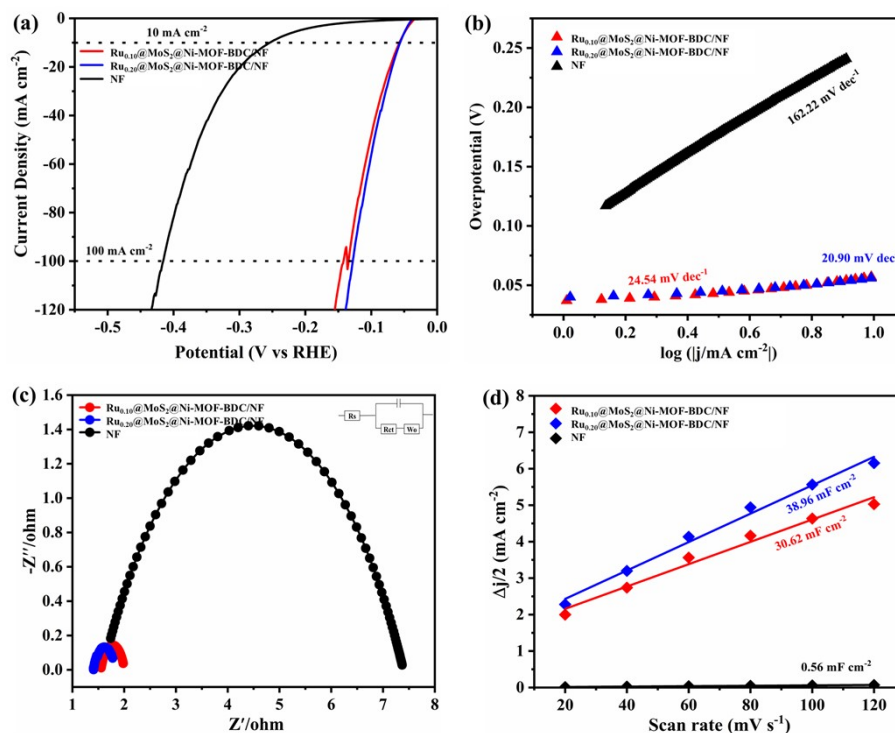

Fig. S6 (a) LSV curves of Ru<sub>x</sub>@MoS<sub>2</sub>@Ni-MOF-BDC/NF (x = 0.10 and 0.20) and NF; (b) Tafel plots, (c) EIS of Ru<sub>0.10</sub>@MoS<sub>2</sub>@Ni-MOF-BDC/NF, Ru<sub>0.20</sub>@MoS<sub>2</sub>@Ni-MOF-BDC/NF and NF electrocatalysts (inset: fitted equivalent circuit), (d) C<sub>dl</sub> value during HER process

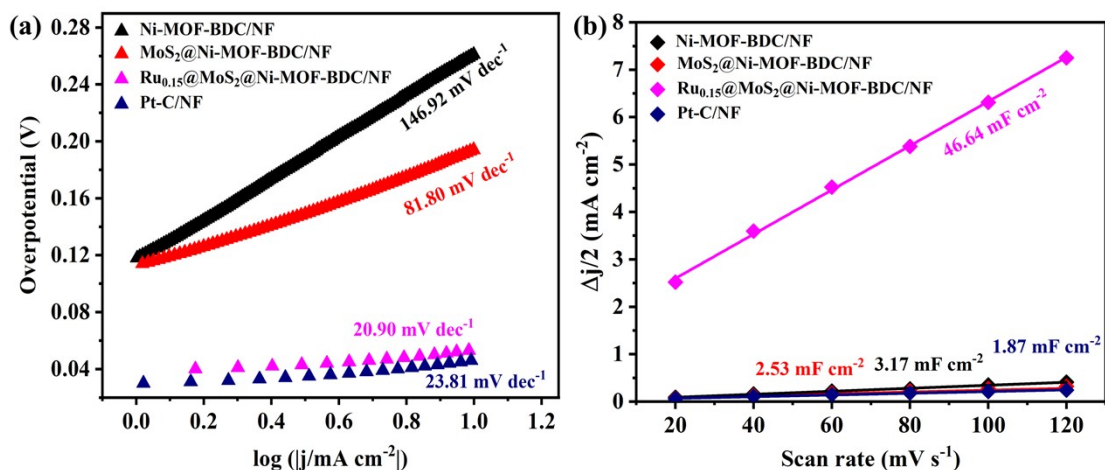

Fig. S7 (a) Tafel plots, (e) C<sub>dl</sub> value derived from CV curves for HER process

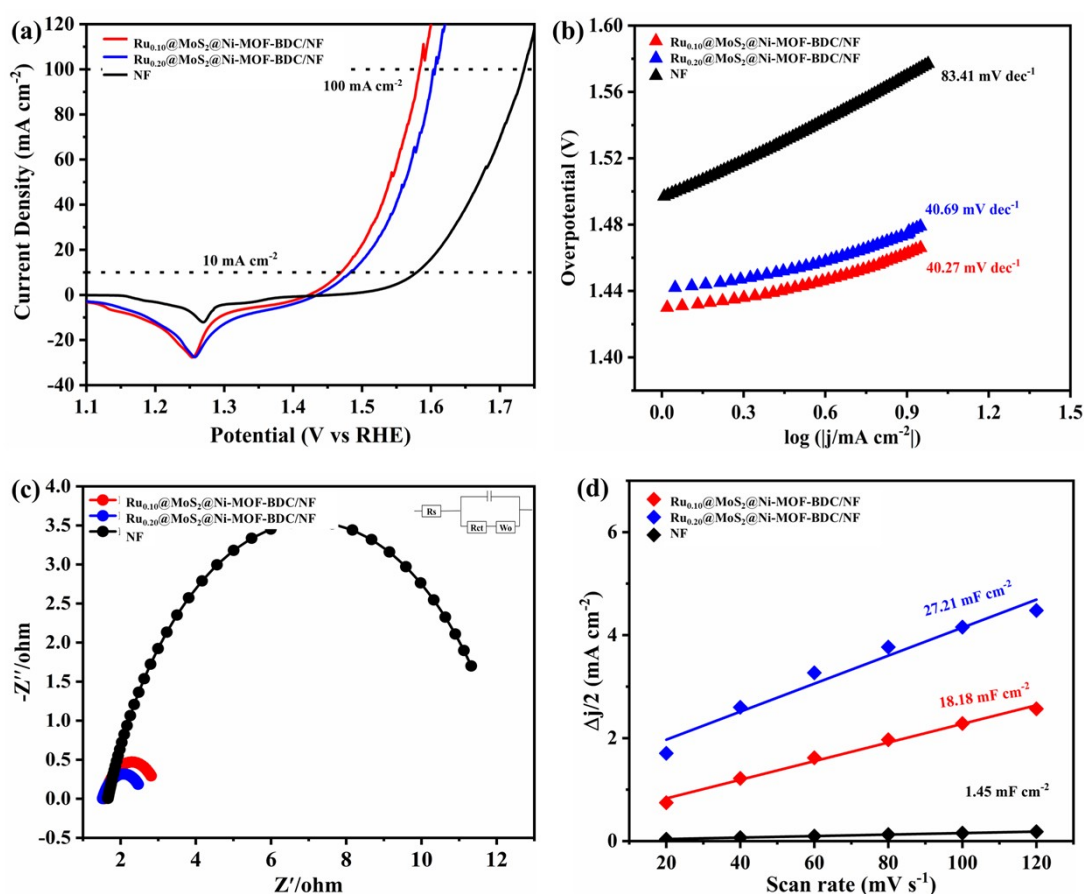

Fig. S8 (a) LSV curves of Ru<sub>x</sub>@MoS<sub>2</sub>@Ni-MOF-BDC/NF (x = 0.10 and 0.20) and NF; (b) Tafel plots, (c) EIS of Ru<sub>0.10</sub>@MoS<sub>2</sub>@Ni-MOF-BDC/NF, Ru<sub>0.20</sub>@MoS<sub>2</sub>@Ni-MOF-BDC/NF and NF electrocatalysts (inset: fitted equivalent circuit), (d) C<sub>dl</sub> value during OER process

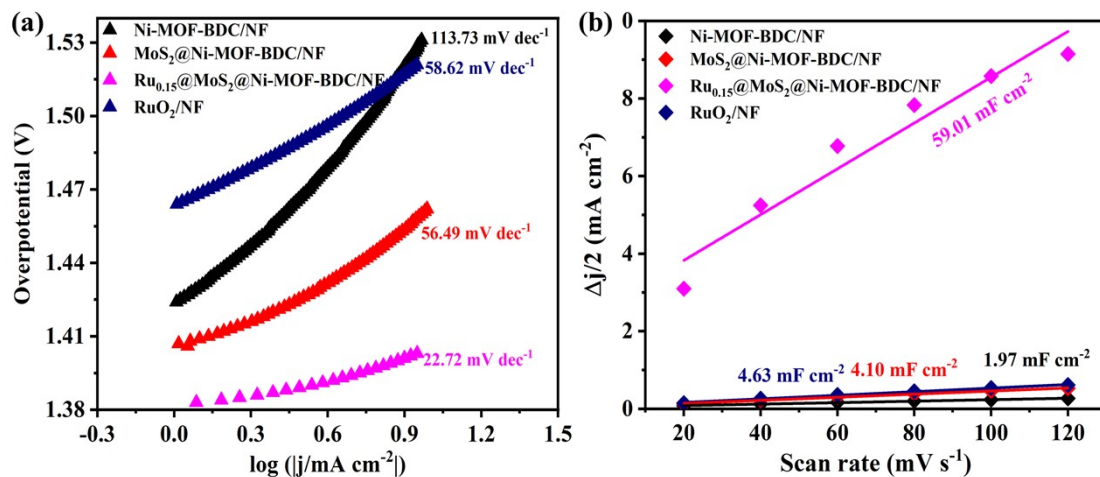

Fig. S9 (a) Tafel plots, (e) Cdl value derived from CV curves for HER process

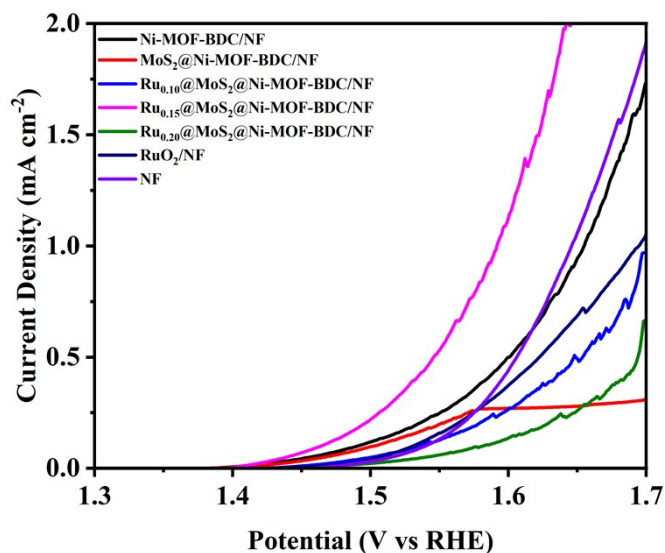

Fig. S10 Polarization curves

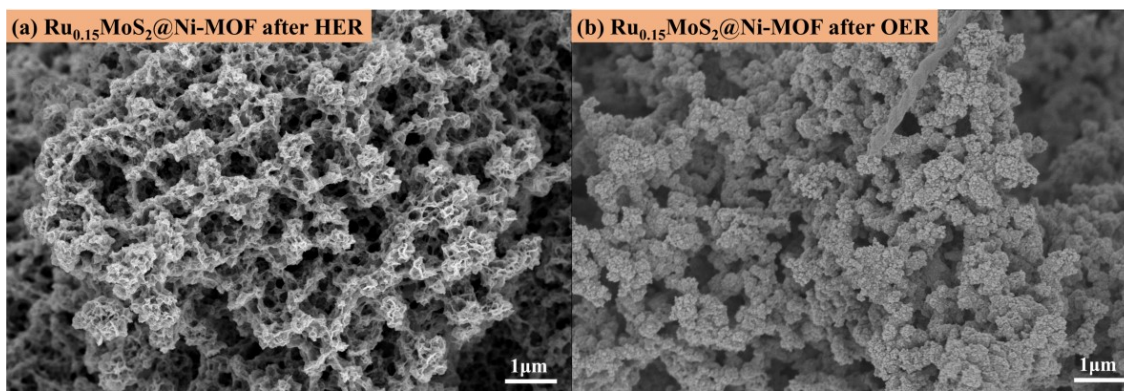

Fig. S11 The SEM images of Ru<sub>0.15</sub>@MoS<sub>2</sub>@Ni-MOF-BDC/NF after the HER (a) and OER (b) tests.



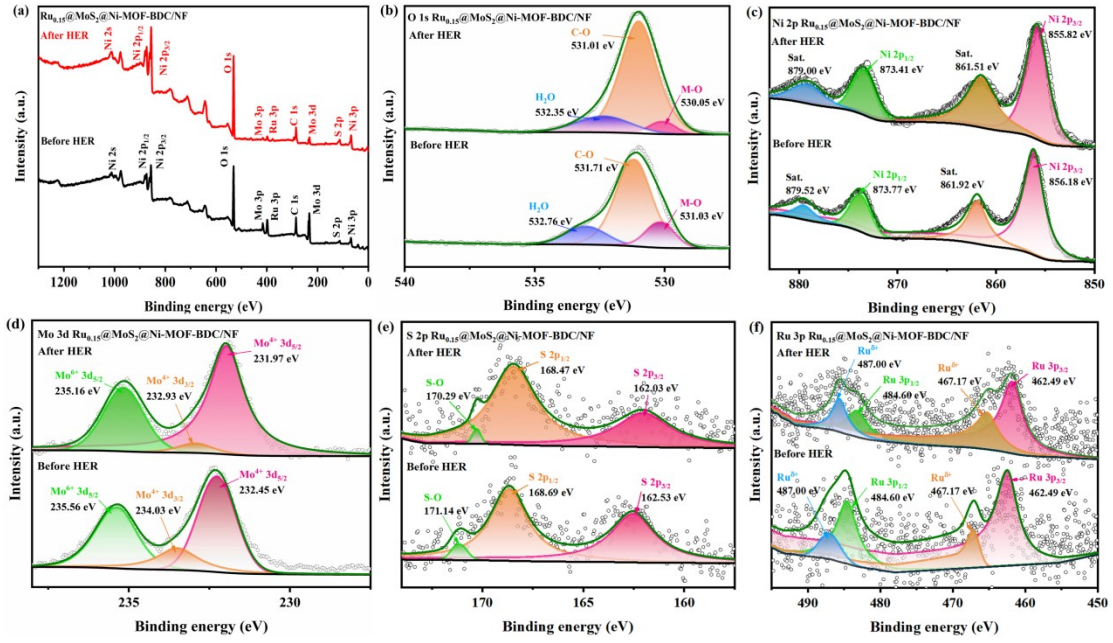

Fig. S12 The XPS spectra of Ru<sub>0.15</sub>@MoS<sub>2</sub>@Ni-MOF-BDC/NF before and after the HER test: (a) the survey spectra, (b) O 1s, (c) Ni 2p, (d) Mo 3d, (e) S 2p and (f) Ru 3p.

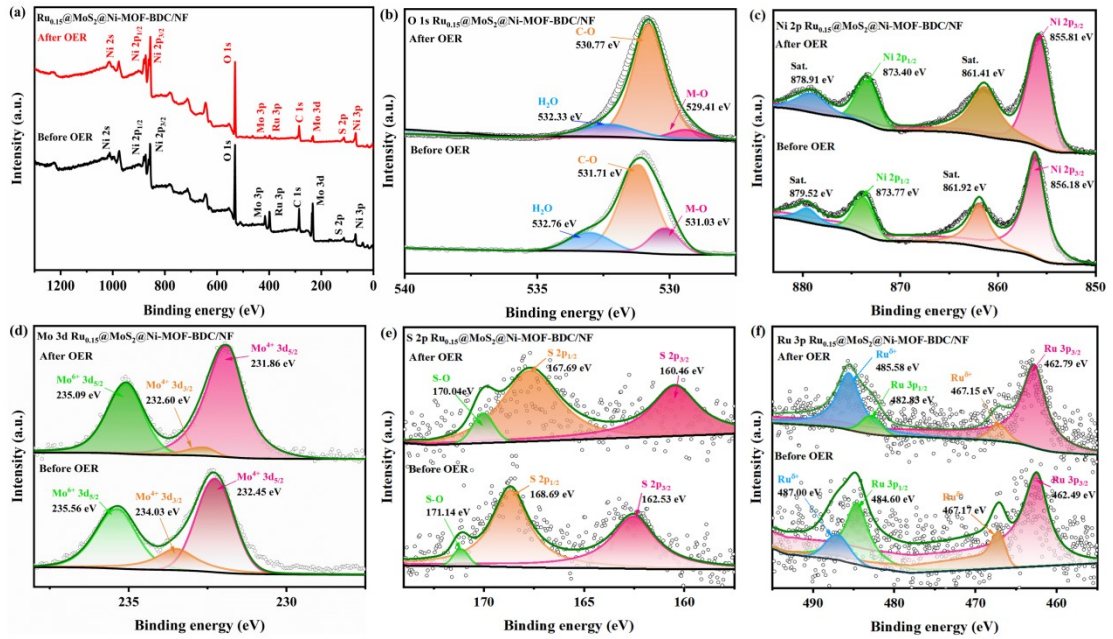

Fig. S13 The XPS spectra of Ru<sub>0.15</sub>@MoS<sub>2</sub>@Ni-MOF-BDC/NF before and after the OER test: (a) the survey spectra, (b) O 1s, (c) Ni 2p, (d) Mo 3d, (e) S 2p and (f) Ru 3p.

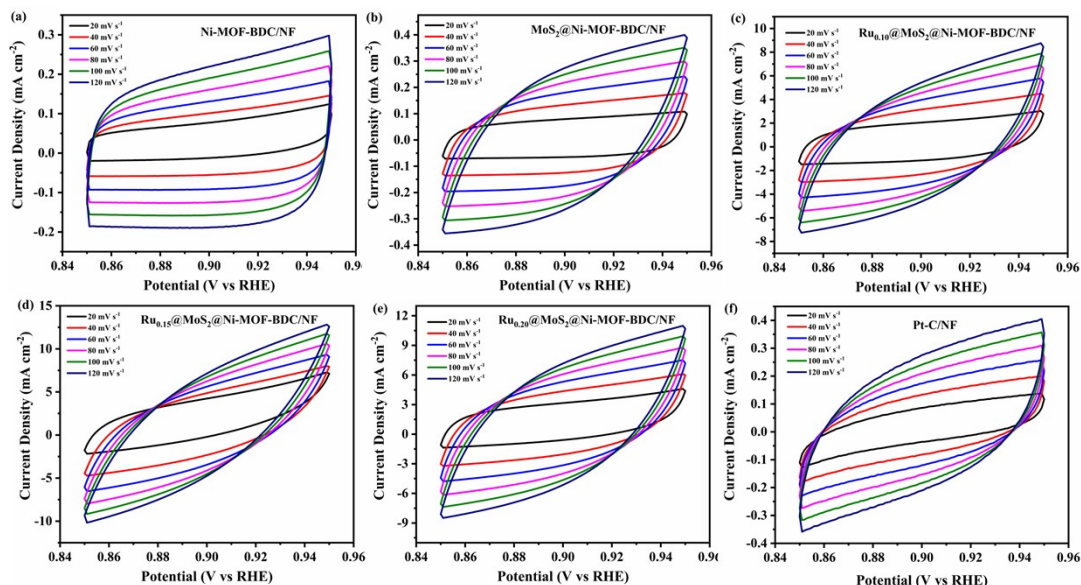

Fig. S14 (a-f) The HER-CV curves for Ni-MOF-BDC/NF, MoS<sub>2</sub>@Ni-MOF-BDC/NF, Ru<sub>x</sub>@MoS<sub>2</sub>@Ni-MOF-BDC/NF (x = 0.10, 0.15 and 0.20) and Pt-C/NF.

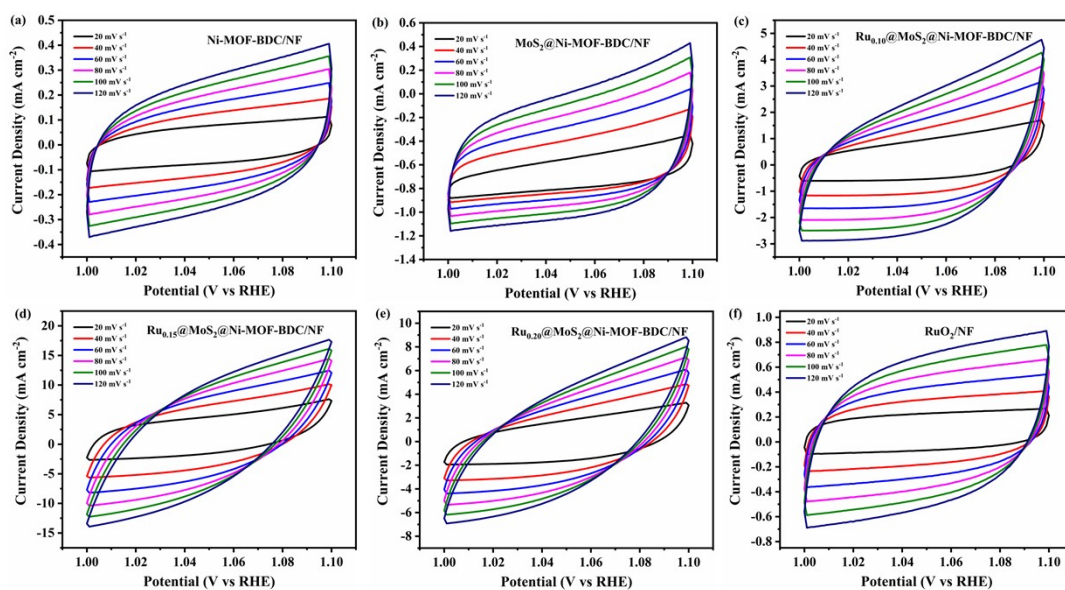

Fig. S15 (a-f) The OER-CV curves for Ni-MOF-BDC/NF, MoS<sub>2</sub>@Ni-MOF-BDC/NF, Ru<sub>x</sub>@MoS<sub>2</sub>@Ni-MOF-BDC/NF (x = 0.10, 0.15 and 0.20) and RuO<sub>2</sub>/NF.

## References

1. D. Liu, H. Xu and Y. Du, *J Mater Chem A*, 2021, **9**, 24670-24676.
2. R. Velayutham, C.J. Raj and B.C. Kim, *Mater Today Nano*, 2023, **24**, 100387.
3. B.F. Banti, M. Goddati and J. Lee, *ChemSusChem*, 2025, **18**, e202402533.
4. W. Sun, J. Hu and J. Chen, *Mater Today Chem*, 2025, **50**, 103241.
5. I.S. Kwon, T.T. Debela and H.S. Kang, *Small*, 2020, **16**, 2000081.
6. A. Salah, H.-D. Ren and Q.A. Drmosh, *ACS Appl Mater Interfaces*, 2024, **16**, 60310-60320.

7. P. Liu, J. Li and W. Song, *Phys Chem Chem Phys*, 2022, **24**, 8344-8350.
8. Y. Duan, Z. Guo and J. Zhang, *J Colloid Interface Sci*, 2025, **680**, 541-551.
9. Y. Li, W. Wang and H. Wang, *J Energy Chem*, 2021, **57**, 99-108.
10. F. Amiripour, S. Ghasemi, *Fuel*, 2023, **346**, 128299.
11. U. Phadikar, G. Sanyal and T. Kuila, *ChemSusChem*, 2024, **17**, e202400821.
